# Supplementary material for: Inhibitory Effect of a Tankyrase Inhibitor on Mechanical Stress-Induced Protease Expression in Human Articular Chondrocytes
Source: MDPI journal article supplement (doi:10.3390/ijms25031443), 2024-01-24
Supplement: s1 [file s1]

# Supplementary Figure S1

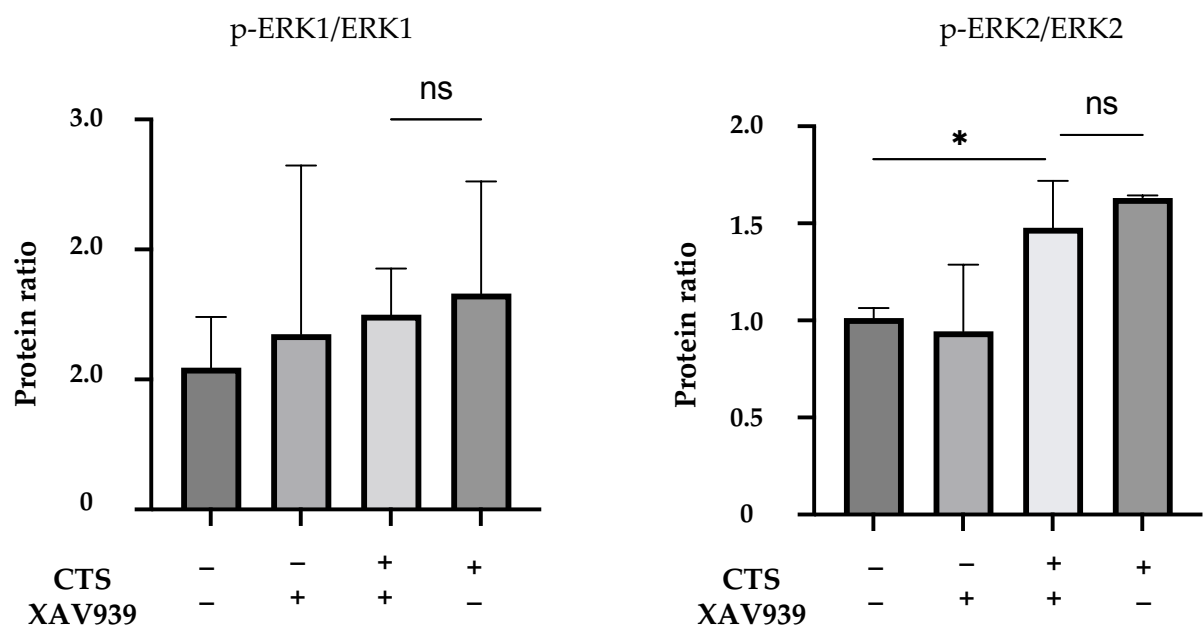

Supplementary Figure S1.

Quantification of the percentage of ERK-1/2 phosphorylation (\* $P < 0.05$ , ns; not significant). The phosphorylation of ERK2 was significant but ERK1 was not in CTS group compared with control group.

# Supplementary Figure S2

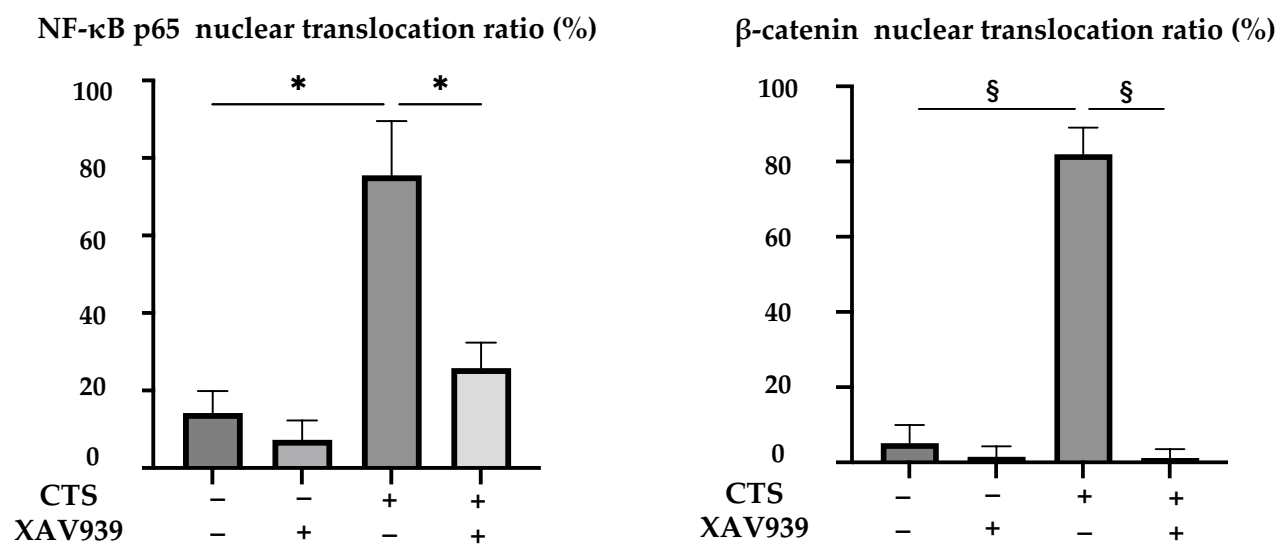

Supplementary Figure S2.

The percentages of chondrocytes positive for nuclear translocation of NF-κB p65 and β-catenin were significantly decreased by treatment with XAV939 by immunocytochemistry (\* $P < 0.05$ , §  $P < 0.0001$ ).

# Supplementary Figure S3

% nuclear  $\beta$ -catenin-positive cells / nuclear NF- $\kappa$ B p65-positive cells

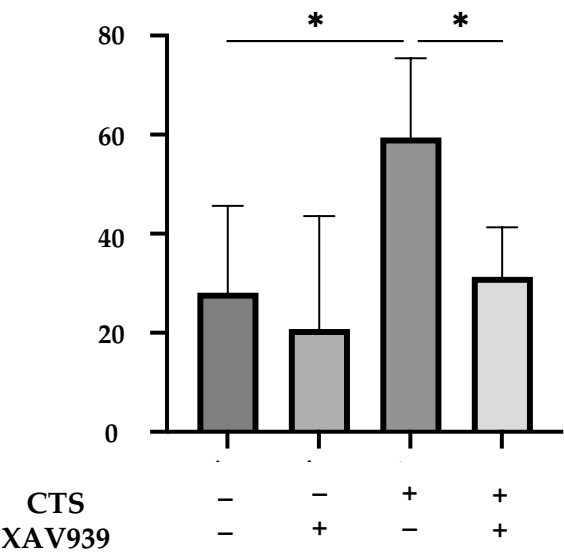

Supplementary Figure S3.

Immunocytochemistry quantification in the form of nuclear  $\beta$ -catenin-positive cells / nuclear NF- $\kappa$ B p65-positive cells was performed (\* $P < 0.05$ ).

Supplementary Figure S4

(A)

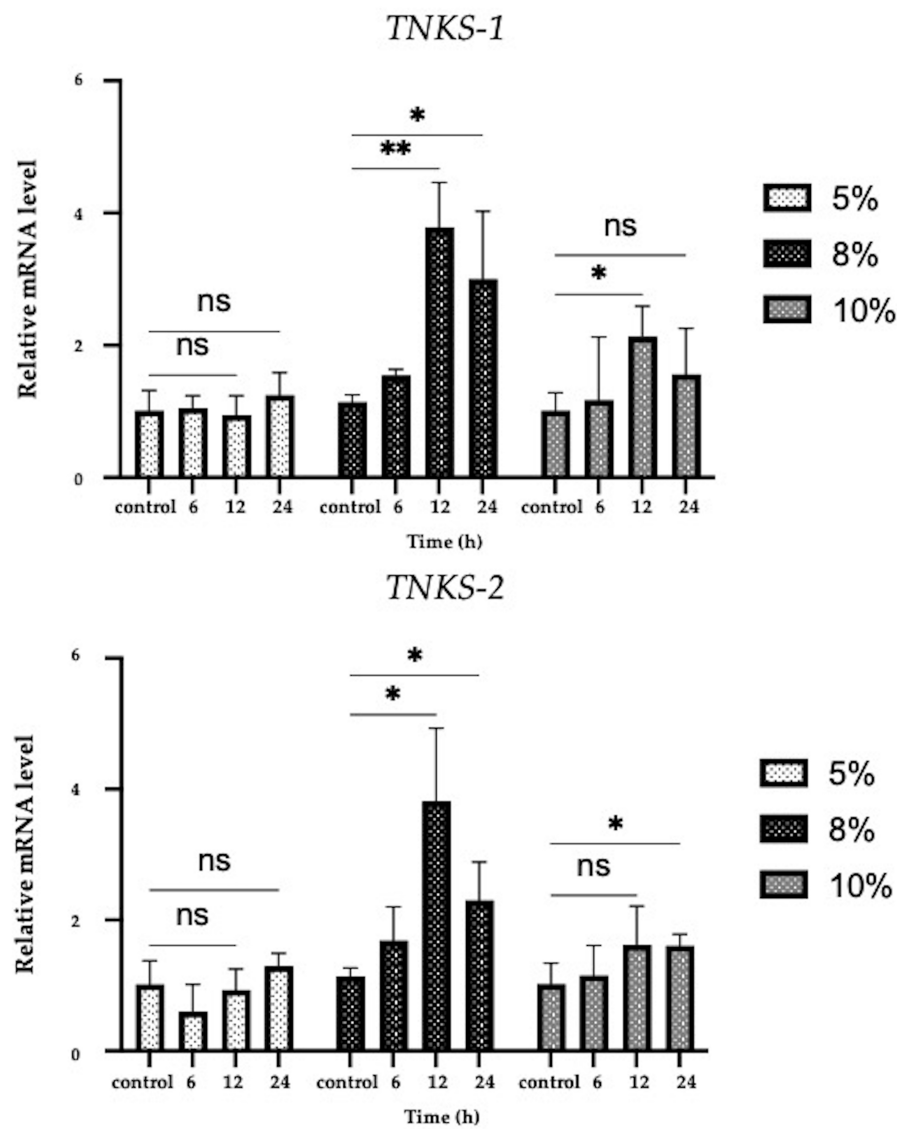

(B)

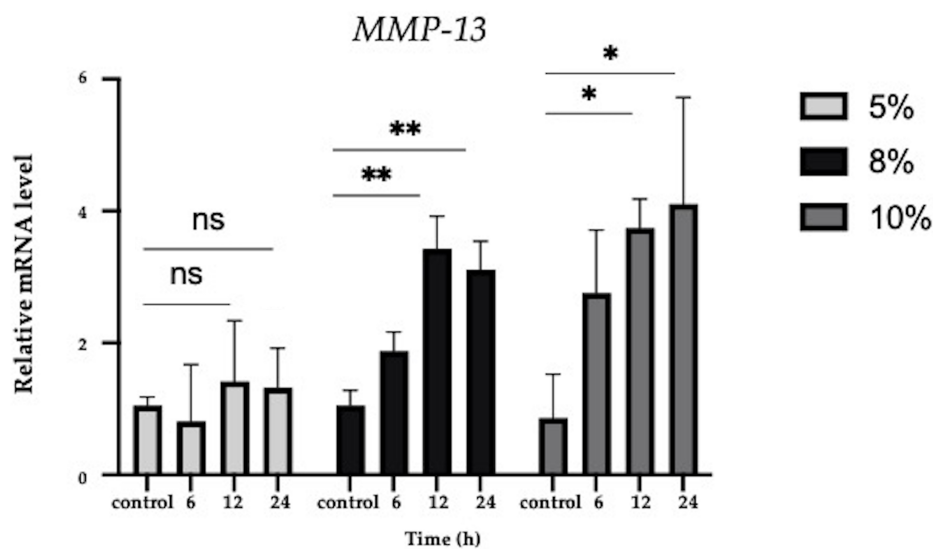

Supplementary Figure S4.

(A) To investigate the appropriate elongation ratio of CTS, we examined the expression of *TNKS-1/2* at different elongation by real-time PCR. The expression of *TNKS-1/2* were significantly increased at 12 h after CTS in 8% elongation compared with control group (\* $P < 0.05$ , \*\*  $P < 0.01$ , ns; not significant).

(B) The expression of *MMP-13* at different elongation. This result means catabolic reaction was promoted at 8 and 10% elongation (\* $P < 0.05$ , \*\*  $P < 0.01$ , ns; not significant).

## Supplementary Figure S5

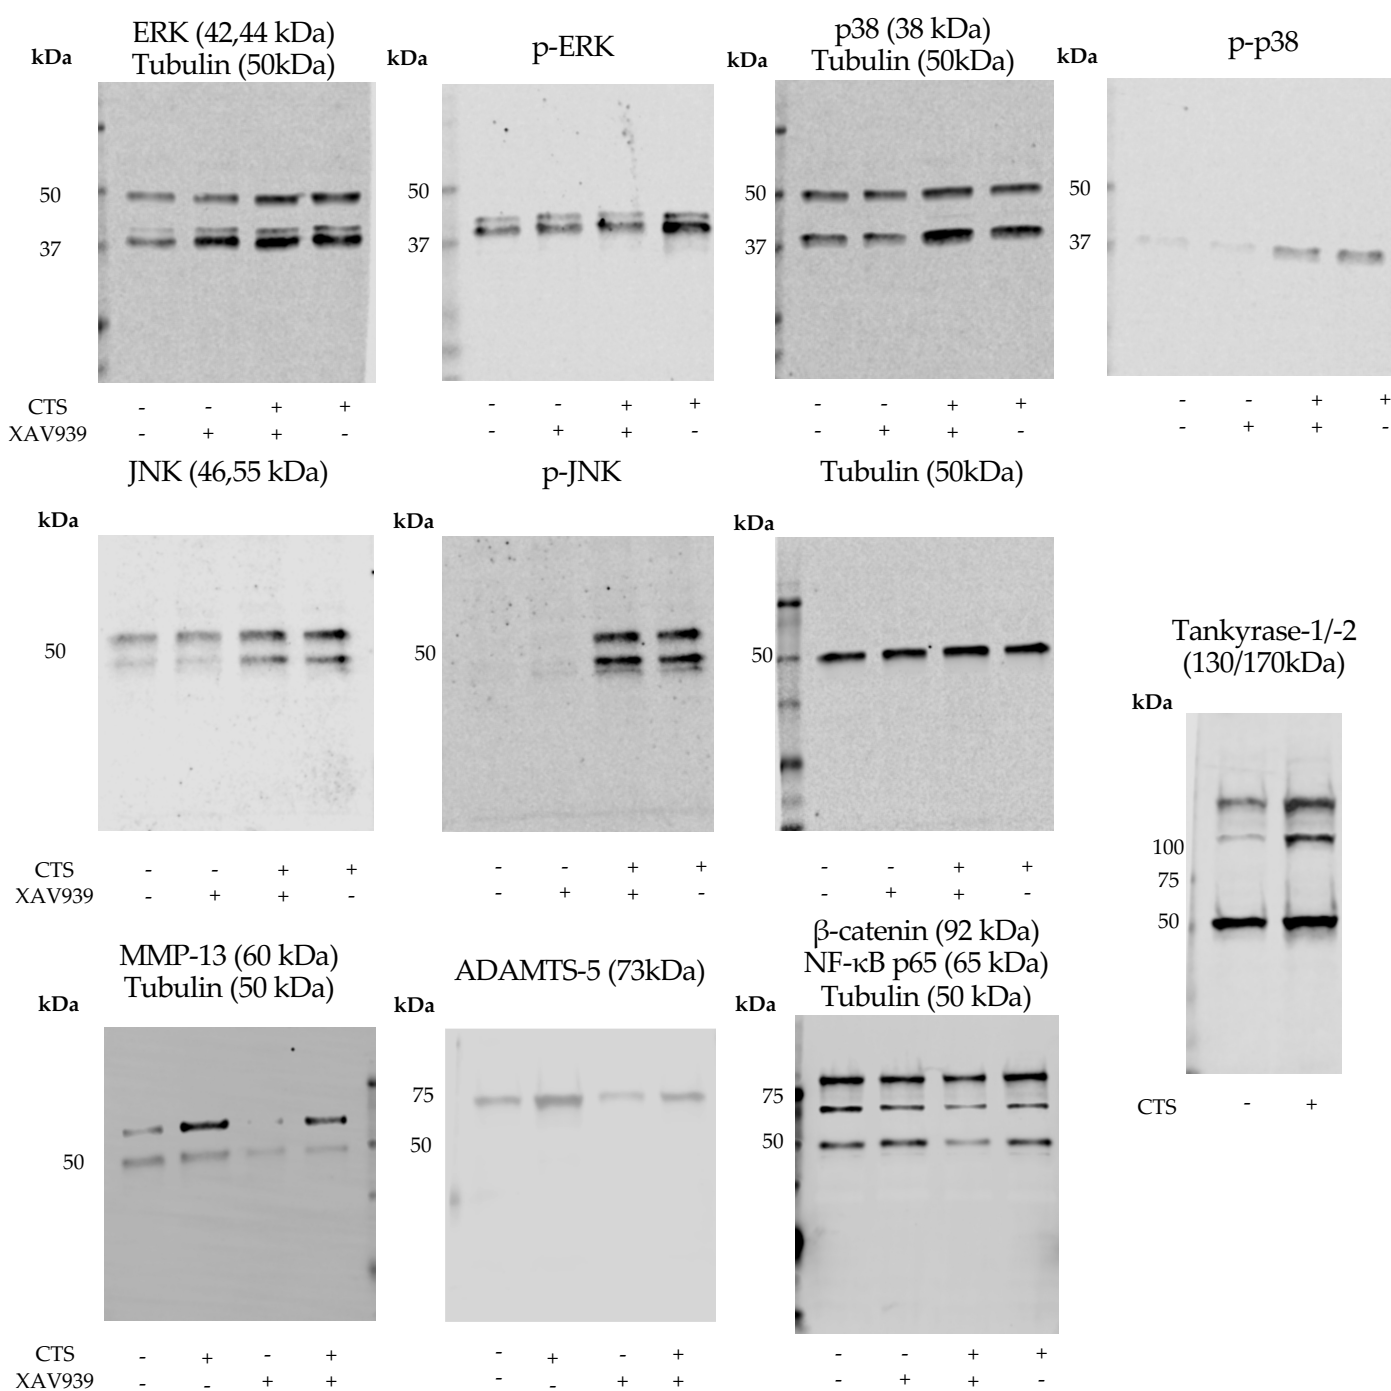

### Supplementary Figure S5.

Original, uncropped western blot images for Figure 3. The bands of ERK, p-ERK, p38, p-p38, JNK, p-JNK, MMP-13, ADAMTS-5, Tankyrase-1/-2,  $\beta$ -catenin, NF- $\kappa$ B p65 and tubulin, and molecular weights of markers in normal human chondrocytes.

# Supplementary Table S1

Individual patient data and Mankin's score and Tankyrases expression ratio in articular cartilage.

| Case No. | Sample No. | Age | Gender | BMI<br>(kg/m²) | Kellgren Lawrence grade | Mankin's score | Grade    | Tankyrases expression ratio (%) |        |      |
|----------|------------|-----|--------|----------------|-------------------------|----------------|----------|---------------------------------|--------|------|
|          |            |     |        |                |                         |                |          | Superficial                     | Middle | Deep |
| OA 01    | 01         | 65  | F      | 33.7           | IV                      | 11             | Severe   | 1.1                             | 5.4    | 3.2  |
|          | 02         |     |        |                |                         | 7              | Moderate | 5.8                             | 34.2   | 24.4 |
| OA 02    | 03         | 64  | M      | 23.6           | IV                      | 8              | Moderate | 22                              | 35.5   | 38.8 |
|          | 04         |     |        |                |                         | 11             | Severe   | 4.5                             | 10.7   | 9.5  |
| OA 03    | 05         | 69  | F      | 16.1           | III                     | 9              | Moderate | 11.1                            | 17.8   | 35.7 |
|          | 06         |     |        |                |                         | 11             | Severe   | 0                               | 16.1   | 5.7  |
| OA 04    | 07         | 61  | F      | 23.5           | III                     | 2              | Low      | 0.56                            | 1      | 0    |
|          | 08         |     |        |                |                         | 3              | Mild     | 28.1                            | 5.4    | 3.7  |
| OA 05    | 09         | 73  | F      | 25.5           | IV                      | 4              | Mild     | 70                              | 39.5   | 14.5 |
| OA 06    | 10         | 52  | F      | 25.1           | III                     | 3              | Mild     | 41.6                            | 9.9    | 0    |
| OA 07    | 11         | 80  | F      | 20.1           | III                     | 5              | Mild     | 35                              | 17.6   | 6.7  |
| OA 08    | 12         | 67  | F      | 23.2           | III                     | 7              | Moderate | 8.4                             | 25.9   | 27.3 |
| OA 09    | 13         | 72  | M      | 26.2           | IV                      | 8              | Moderate | 6.6                             | 16.2   | 36.3 |
| OA 10    | 14         | 73  | F      | 29.8           | IV                      | 6              | Mild     | 48.9                            | 30     | 16   |
| OA 11    | 15         | 74  | M      | 27.6           | IV                      | 1              | Low      | 0                               | 0.4    | 2    |
| OA 12    | 16         | 65  | F      | 25.1           | IV                      | 2              | Low      | 1.1                             | 4.1    | 0.5  |
| OA 13    | 17         | 85  | F      | 20.1           | III                     | 11             | Severe   | 9.5                             | 11.3   | 12.5 |
| OA 14    | 18         | 67  | F      | 23.2           | IV                      | 12             | Severe   | 9.8                             | 19     | 14.9 |

## Supplementary Table S1.

Tankyrases expression ratio was determined by dividing the number of chondrocytes positive for TNKS-1/2 by the total number of chondrocytes in superficial, middle, and deep layers. The ratio was the average of three fields of view.

BMI ;Body Mass Index
